# Supplementary material for: 3D-printed flexible energy harvesting devices designed using non-layered two-dimensional natural tourmaline silicates
Source: Royal Society of Chemistry journal article supplement (doi:10.1039/d3tc04167k), 2024-01-01
Supplement: d3tc04167k1.pdf [file d3tc04167k1.pdf]

## Supporting Information

### 3D-Printed Flexible Energy Harvesting Devices using Non-layered Two-Dimensional Tourmaline Natural Silicates

*Preeti Lata Mahapatra<sup>a†</sup>, Raphael Tromer<sup>b†</sup>, Anjali Jayakumar<sup>a,c</sup>, Gelu Costin<sup>d</sup>, Basudev Lahiri<sup>e</sup>, Rahul R. Nair<sup>c</sup>, Debmalya Roy<sup>f</sup>, Ajit K. Roy<sup>g</sup>, Prafull Pandey<sup>h</sup>, Douglas S. Galvao<sup>b\*</sup>, Chandra Sekhar Tiwary<sup>i\*</sup>*

<sup>a</sup>School of Nano Science and Technology, Indian Institute of Technology, Kharagpur, West Bengal-721302 India

<sup>b</sup>Applied Physics Department, State University of Campinas, Campinas, SP, 13083-970, Brazil

Email:

<sup>c</sup>Department of Chemical Engineering and Analytical Science, The University of Manchester, Manchester M13 9PL, United Kingdom

<sup>d</sup>Department of Earth, Environmental and Planetary Sciences, Rice University, Houston, Texas 77005, United States

<sup>e</sup>Department of Electronics and Electrical Communication Engineering, Indian Institute of Technology Kharagpur, Kharagpur 721302, India

<sup>f</sup>Directorate of Nanomaterials, Defence Materials and Stores Research and Development Establishment (DMSRDE), Kanpur, Uttar Pradesh 208013

<sup>g</sup>Materials and Manufacturing Directorate, Air Force Research Laboratory, Wright Patterson AFB, OH 45433-7718, USA

<sup>h</sup>Materials Engineering, Indian Institute of Science, Bangalore, India-560012

<sup>i</sup>Metallurgical and Materials Engineering, Indian Institute of Technology Kharagpur, Kharagpur 721302, India

\*Corresponding author E-mail: [chandra.tiwary@metal.iitkgp.ac.in](mailto:chandra.tiwary@metal.iitkgp.ac.in) (C. S. Tiwary),  
[galvao@ifi.unicamp.br](mailto:galvao@ifi.unicamp.br) (D. S. Galvao)

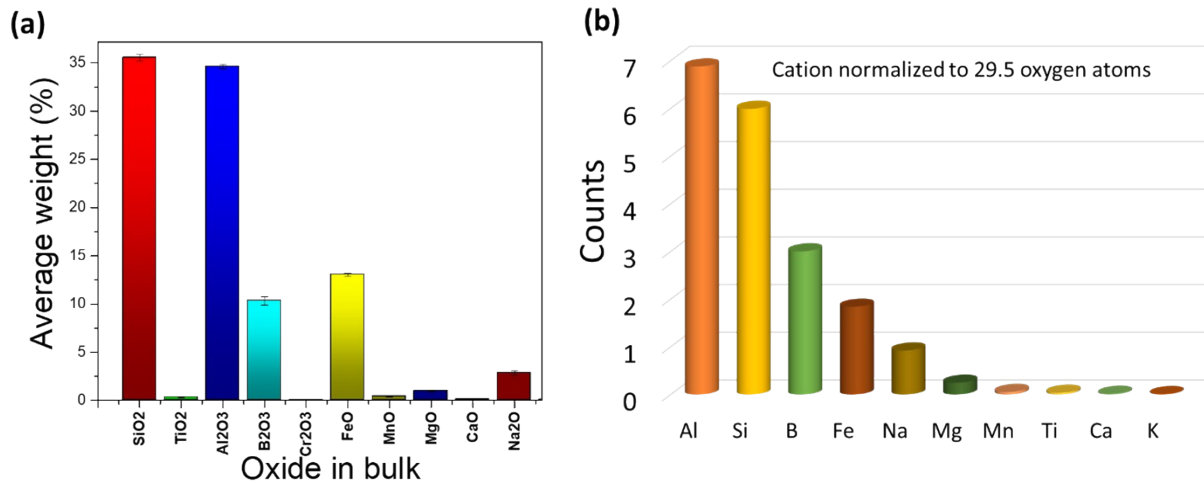

**Fig. S1.** EPMA study of bulk T-silicate showing (a) Weight % distribution of oxide compound contribution, and (b) Cations present normalized by 29.5 oxygen atoms.

**Table S1:** EPMA study of bulk T-silicate showing weight % distribution of oxide compound contributions.

| Oxide                          | Average (wt. %) | St Dev |
|--------------------------------|-----------------|--------|
| SiO <sub>2</sub>               | 35.5            | 0.2    |
| TiO <sub>2</sub>               | 0.3             | 0.02   |
| Al <sub>2</sub> O <sub>3</sub> | 34.6            | 0.2    |
| B <sub>2</sub> O <sub>3</sub>  | 10.3            | 0.4    |
| Cr <sub>2</sub> O <sub>3</sub> | 0.004           | 0.006  |
| FeO                            | 13.0            | 0.1    |
| MnO                            | 0.4             | 0.02   |
| MgO                            | 0.9             | 0.03   |
| CaO                            | 0.08            | 0.02   |
| Na <sub>2</sub> O              | 2.8             | 0.2    |
| K <sub>2</sub> O               | 0.04            | 0.01   |
| F                              | 0.08            | 0.07   |

**Table S2:** EPMA study of bulk T-silicate showing the number of cations present normalized by 29.5 oxygen atoms.

| <b>Cation normalized to 29.5 oxygen atoms</b> |       |
|-----------------------------------------------|-------|
| Si                                            | 5.9   |
| Ti                                            | 0.04  |
| Al                                            | 6.8   |
| B                                             | 3.0   |
| Cr                                            | 0.001 |
| Fe                                            | 1.8   |
| Mn                                            | 0.05  |
| Mg                                            | 0.2   |
| Ca                                            | 0.01  |
| Na                                            | 0.9   |
| K                                             | 0.009 |
| <b>Anions</b>                                 |       |
| F                                             | 0.04  |
| OH                                            | 2.9   |

**Table S3:** Zeta potential series data of T-silicates in IPA.

| Temperatur<br>e<br>°C | Mean zeta<br>potential<br>mV | Distribution<br>peak<br>mV | Conductivity<br>(mS/cm) x 10 <sup>-4</sup> | Electrophoretic<br>mobility<br>( $\mu\text{m} \times \text{cm}/\text{Vs}$ ) | Processed<br>runs |
|-----------------------|------------------------------|----------------------------|--------------------------------------------|-----------------------------------------------------------------------------|-------------------|
| 30                    | -29.9                        | -31.1                      | 5.99                                       | -0.28                                                                       | 1000              |
| 30                    | -28.4                        | -10.4                      | 5.94                                       | -0.26                                                                       | 1000              |
| 30                    | -30.1                        | -12.4                      | 5.82                                       | -0.28                                                                       | 200               |
| 30                    | -30.6                        | -17.7                      | 5.86                                       | -0.28                                                                       | 140               |

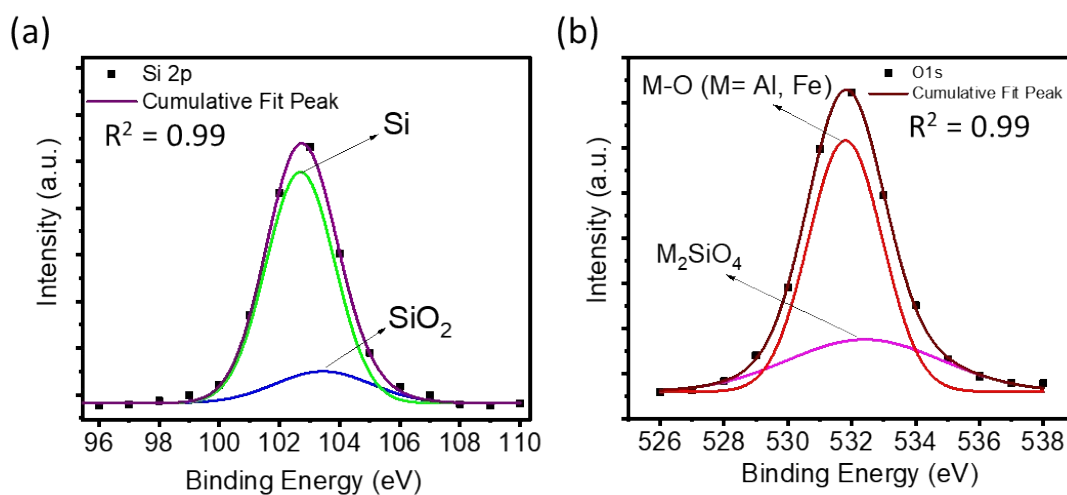

**Fig. S2.** Deconvoluted XPS spectra of (a) Si 2p and (b) O 1s spectra of 2D T-silicate.

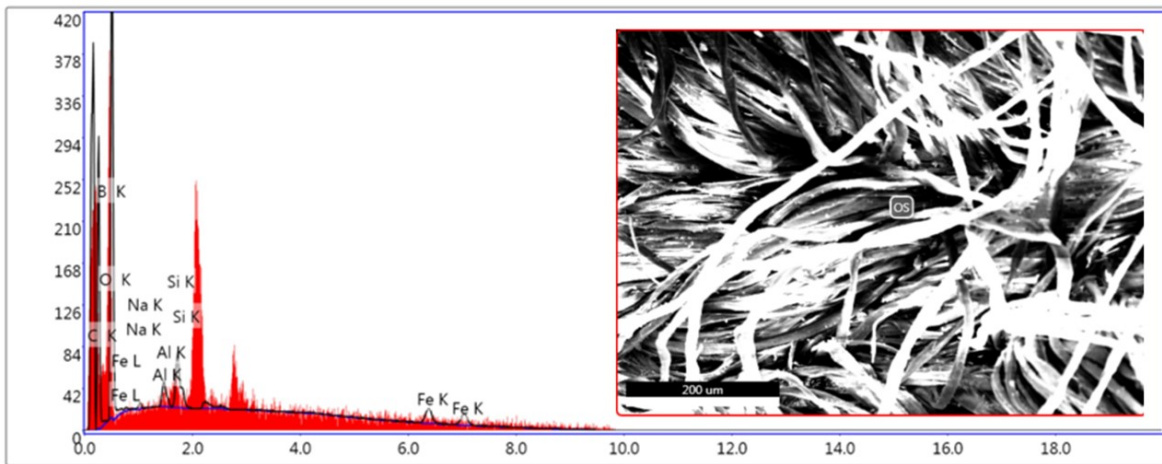

**Fig. S3.** EDS analysis of 2D T-silicate coated cotton fabric.

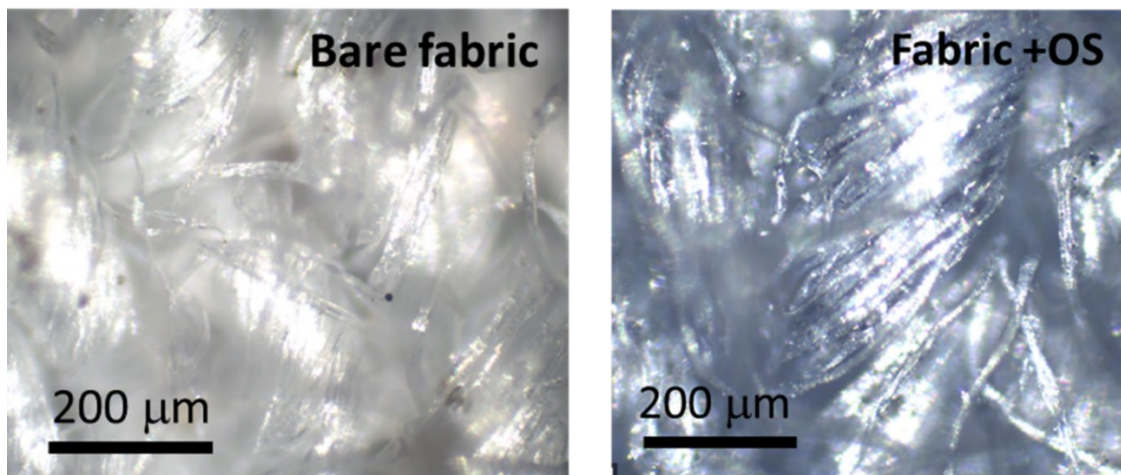

**Fig. S4.** Optical images of 2D T-silicate coated cotton fibers.

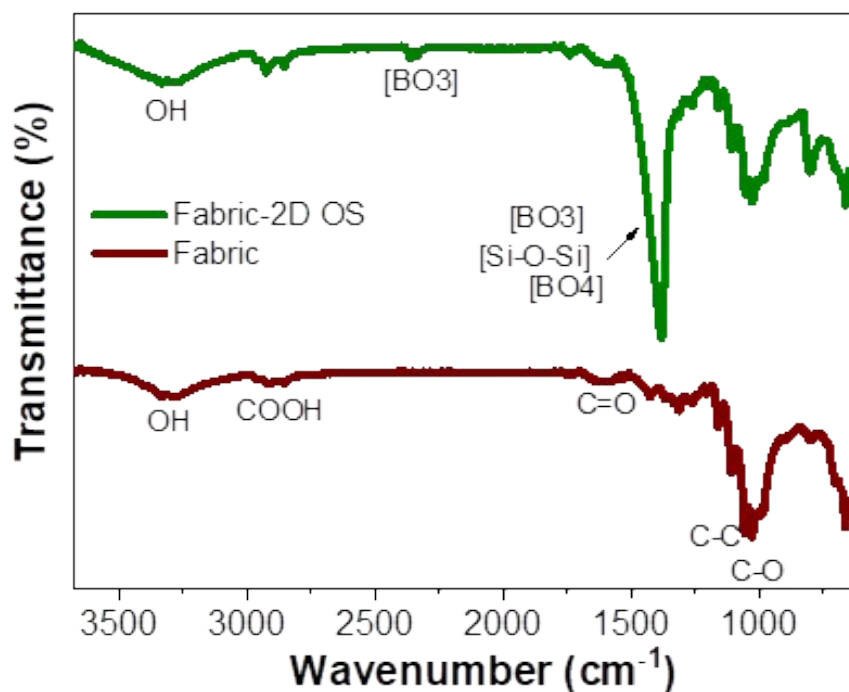

**Fig. S5.** FTIR comparative analysis of T-silicate coated cotton fabric and only fabric.

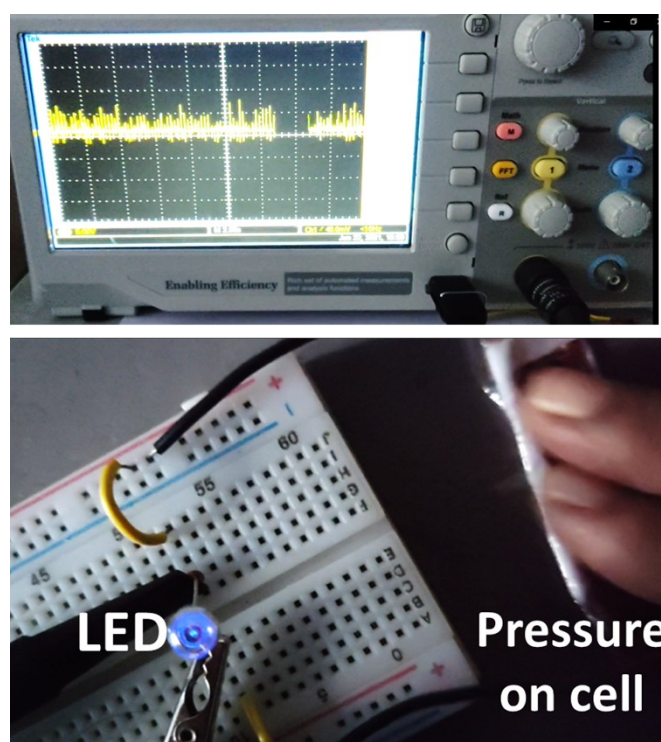

**Fig. S6.** Tapping of T-silicate-fabric device real-time response image showing glow of a blue LED.

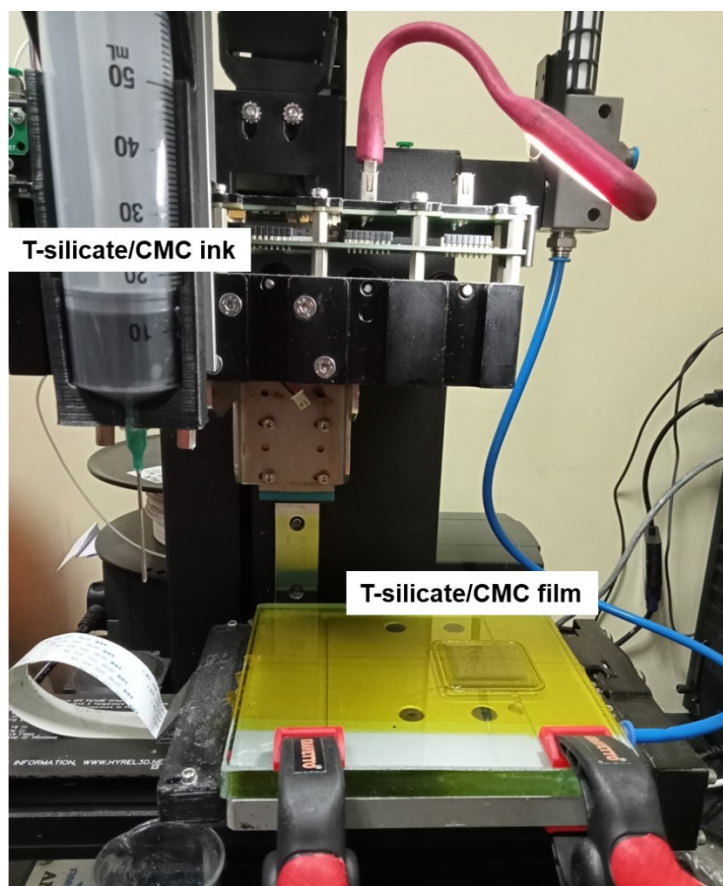

**Fig. S7.** Digital image of the 3D printer (*Hyrel*) with T-silicate/CMC ink in the syringe and freshly printed film on the print bed.

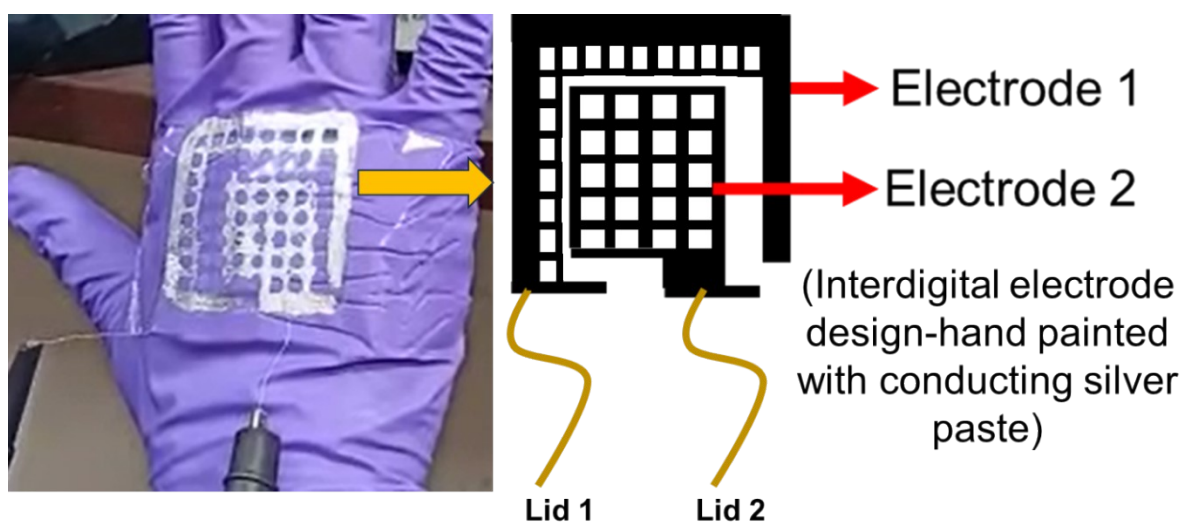

**Fig. S8.** Digital image of mesh film CMC-TS device mounted on the glove during measurement, the schematic at right shows the electrode design.



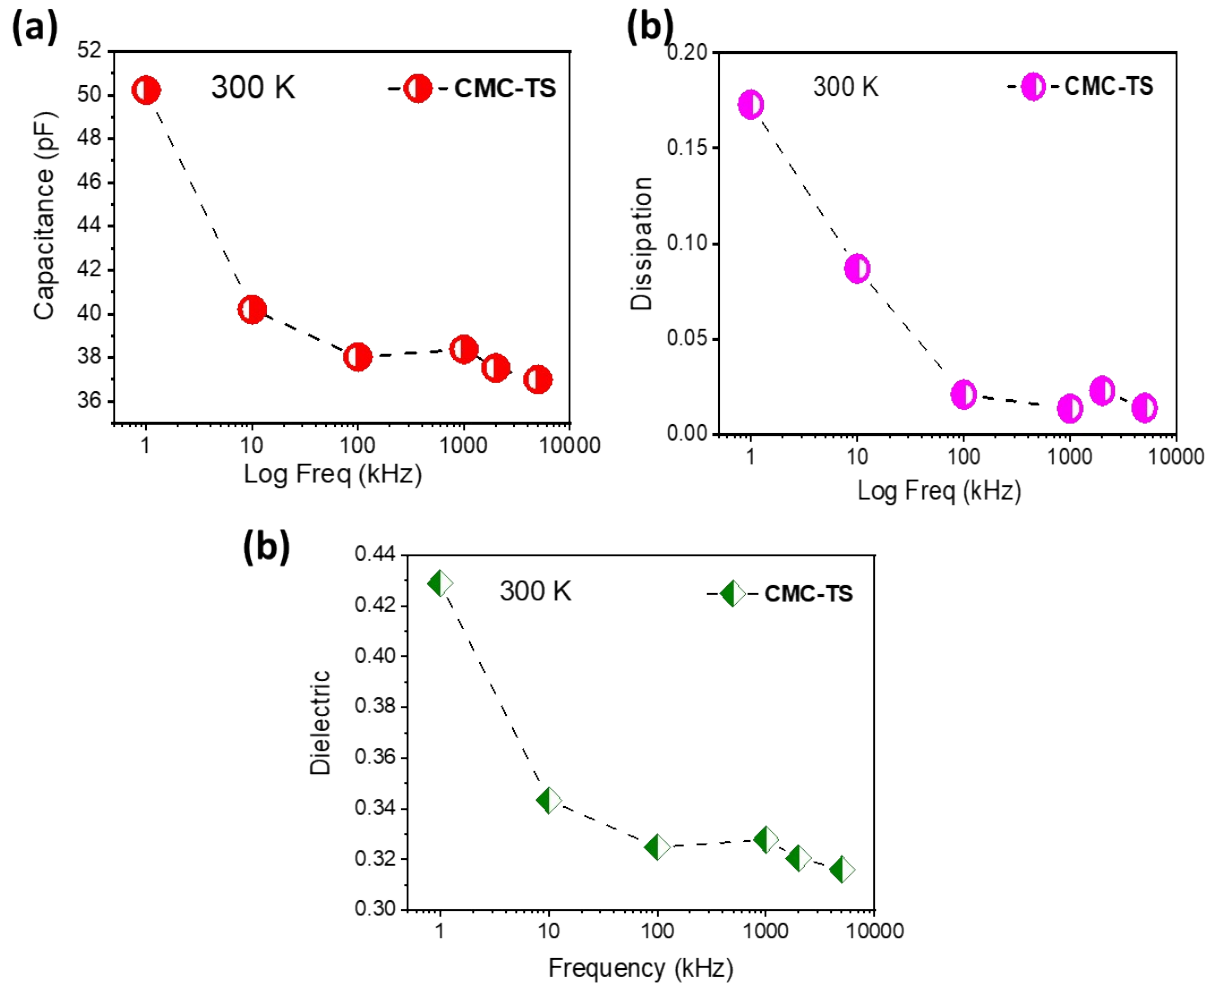

**Fig. S9.** (a) Capacitance at room temperature for T-silicate-CMC device at variable frequency. (b) Dissipation graph of the fabricated device from T-silicate-CMC, and (c) The dielectric constant value of the device as a function of the frequency.



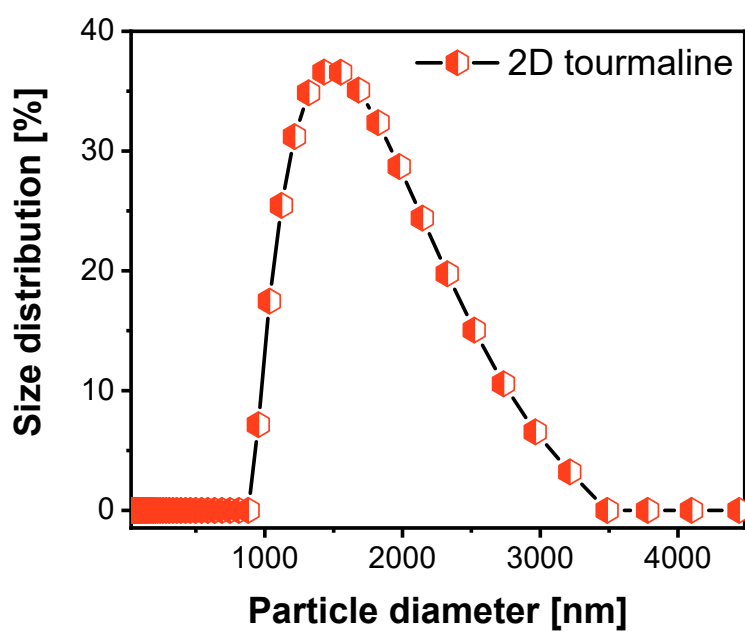

**Fig. S10.** Size distribution graph of particle diameter of exfoliated tourmaline obtained with particle size analyzer.

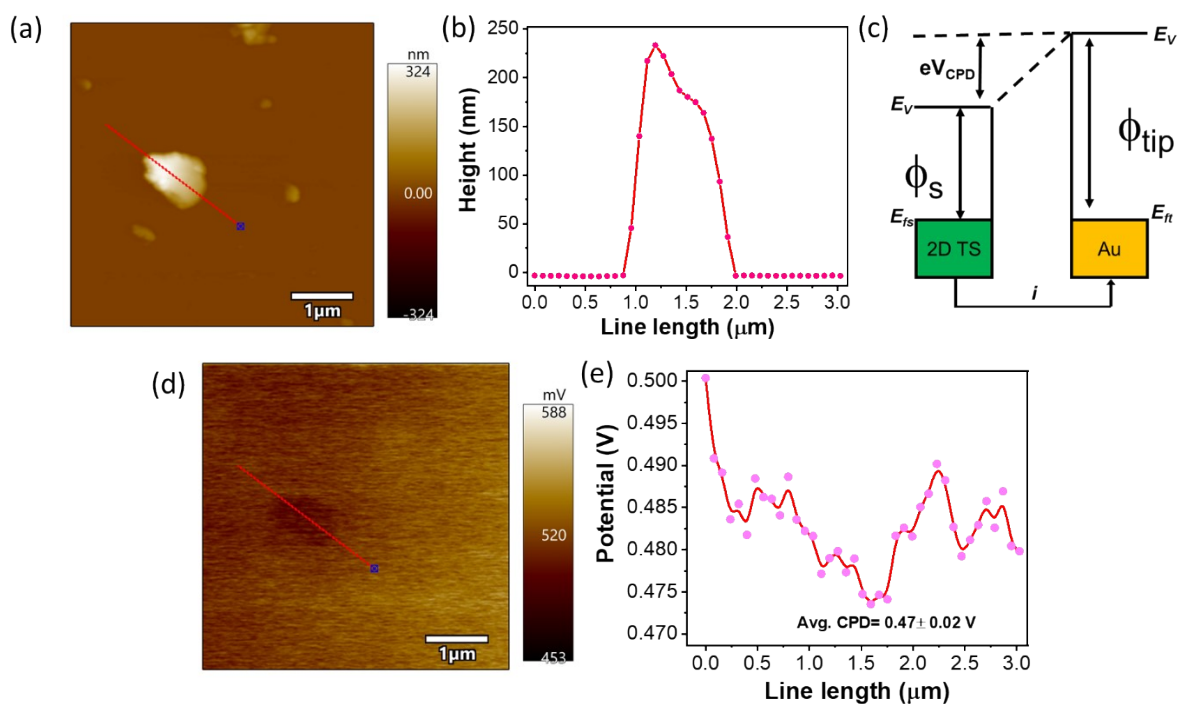

**Fig. S11.** KPFM obtained (a-b) height profile image and graph of marked T-silicate particle, (c) schematic of KPFM-based electronic bands between tip and sample. (d) potential image and (e) potential graph showing CPD value.

The work function is a property of materials that determines how easily electrons can be emitted from them. A lower work function means electrons can move between energy bands more easily. **Figure S11(a-b)** shows the data taken with KPFM to observe the work function of the material. During the experiments, the surface potential could not be measured for thinner sheets due to resolution issues. Therefore, a thicker particle/ agglomerated particle was used to measure the work function. **Figure S11(e)** shows the measured contact potential difference (CPD) of sample  $\sim 0.47\text{V}$ . Subtracting this from the tip work function ( $\sim 6.6\text{V}$ ), we get the work function of the sample to be  $\sim 6.2\text{V}$ . Fermi level alignment is introduced by electrical contact between the tip and the sample via current flow  $i$ , which causes an offset in the vacuum levels  $E_v$  and the contact potential difference  $V_{\text{CPD}}$  (shown schematically in **Figure S11(c)**). A work function greater than 6 volts indicates a relatively high energy barrier for electron emission. This is due to the high dielectric nature of the silicate, which makes the flow of electrons difficult. In the context of piezoelectric/flexoelectric materials, the work function can affect the charge distribution and polarization of the material in response to mechanical stress. The work function of this type of material may be lowered after applying mechanical stress.

**Table S4:** comparison of theoretical piezoelectric constant of different nanomaterials including this work

| Material                             | Formula                                                                                                                    | Theoretical piezoelectric constant (pm/V or pC/N) | Reference |
|--------------------------------------|----------------------------------------------------------------------------------------------------------------------------|---------------------------------------------------|-----------|
| PVDF                                 | $(\text{CH}_2\text{CF}_2)_n$                                                                                               | $d_{31} = 28$                                     | S1        |
| Zinc oxide                           | ZnO                                                                                                                        | $d_{33} = 12$                                     | S1        |
| Barium titanate (single crystalline) | $\text{BaTiO}_3$                                                                                                           | $d_{15} = 587$                                    | S1        |
| Barium titanate (polycrystalline)    | $\text{BaTiO}_3$                                                                                                           | $d_{15} = 270$                                    | S1        |
| Quartz                               | $\text{SiO}_2$                                                                                                             | $d_{11} = 2.3$                                    | S1        |
| 2D Tourmaline                        | $\text{Na}(\text{Fe}^{2+}_2\text{Al})_{\Sigma=3}\text{Al}_6(\text{Si}_6\text{O}_{18})(\text{BO}_3)_3(\text{OH})_3\text{O}$ | $d_{11} = 2.0$                                    | This work |

## **Supporting References**

[S1] N. SC, Abrahams; N, *Concise encyclopedia of advanced ceramic materials*, 1991.
